# Supplementary material for: Polypyrrole as Adsorbent in Magnetic Solid Phase Extraction for Progesterone Determination from Human Plasma
Source: PubMed Central journal article supplement (PMC11425601; doi:10.1021/acsomega.4c05456), 2024-09-11
Supplement: ao4c05456_si_001.pdf [file ao4c05456_si_001.pdf]

## **Supplementary material**

### **Polypyrrole as adsorbent in magnetic solid phase extraction for progesterone determination from human plasma**

Iara Amorim Carvalho, Camilla Fonseca Silva, Raíra da Cunha and Keyller Bastos Borges\*

Departamento de Ciências Naturais, Universidade Federal de São João del-Rei, Campus Dom Bosco, Praça Dom Helvécio 74, Fábricas, 36301-160, São João del-Rei, Minas Gerais, Brazil

\*Corresponding author:

Prof. Keyller Bastos Borges, PhD, Departamento de Ciências Naturais, Universidade Federal de São João del-Rei, Campus Dom Bosco, Praça Dom Helvécio 74, Fábricas, 36301-160, São João del-Rei, Minas Gerais, Brazil

\*e-mail: [keyller@ufsj.edu.br](mailto:keyller@ufsj.edu.br)

Phone number.: +55 32 3379 – 5163

## Tables

**Table S1.** Infrared absorption values of Fe<sub>3</sub>O<sub>4</sub>, Fe<sub>3</sub>O<sub>4</sub>@SiO<sub>2</sub> and MMPPy.

| <b>Wavenumber / cm<sup>-1</sup></b> | <b>Assignmentt</b>                                                     |
|-------------------------------------|------------------------------------------------------------------------|
| 586                                 | Fe-O vibration                                                         |
| 1100 / 804                          | Asymmetric stretching of the Si-O-Si bond                              |
| 948                                 | Stretch vibration of Si-O                                              |
| 960                                 | Si-OH elongation                                                       |
| 3100                                | Stretching and deformation of the C-H bond of aromatic rings           |
| 1506 / 1499                         | C=C elongation of pyrrole ring                                         |
| 1553 / 1465                         | Asymmetric and symmetric C-C stretching vibrations of the pyrrole ring |
| 1309                                | C-N Stretching bond of pyrrole ring                                    |
| 1180                                | C-C elongation.                                                        |
| 1045                                | C-H vibration bond of pyrrole ring                                     |
| 916                                 | C-C deformation vibration outside the plane of the pyrrole ring        |

**Table S2.** Semi-quantitative elemental composition of Fe<sub>3</sub>O<sub>4</sub>, Fe<sub>3</sub>O<sub>4</sub>@SiO<sub>2</sub> and MMPPy by EDS.

| <b>Elements</b>                                    | <b>Fe</b> | <b>C</b> | <b>O</b> | <b>Ti</b> | <b>Si</b> | <b>Al</b> | <b>Total</b> |
|----------------------------------------------------|-----------|----------|----------|-----------|-----------|-----------|--------------|
| <b>Fe<sub>3</sub>O<sub>4</sub></b>                 | 34.67     | 25.05    | 38.83    | -         | -         | 1.45      | 100.00       |
| <b>Fe<sub>3</sub>O<sub>4</sub>@SiO<sub>2</sub></b> | 16.37     | -        | 61.70    | -         | 20.51     | 1.42      | 100.00       |
| <b>MMPPy</b>                                       | 3.79      | 61.59    | 23.20    | 1.80      | 9.62      | -         | 100.00       |

**Table S3.** Optimized conditions for MSPE.

| <b>Parameters</b>           | <b>Optimized conditions</b> |
|-----------------------------|-----------------------------|
| Washing solvent             | Ultrapure water             |
| Washing solvent volume      | 500 $\mu\text{L}$           |
| Eluent type                 | acetonitrile                |
| Eluent volume               | 1000 $\mu\text{L}$          |
| Amount of adsorbent (MMPPy) | 10 mg                       |
| Sample volume               | 1000 $\mu\text{L}$          |
| Sample pH                   | No adjustment               |
| Enrichment factor           | 20                          |

The eluates were dried, resuspended in 50  $\mu\text{L}$  of methanol and 20  $\mu\text{L}$  submitted to chromatographic analysis.

**Table S4.** Chromatographic parameters obtained by developed method.

| <b>Parameters</b>          | <b>Progesterone</b> |
|----------------------------|---------------------|
| <i>t<sub>r</sub> / min</i> | 7.93                |
| <i>k</i>                   | 5.63                |
| <i>Area / %RSD</i>         | 2.92                |
| <i>N</i>                   | 7725                |
| <i>A<sub>F</sub></i>       | 1.16                |

*t<sub>r</sub>* = retention time; *k* = retention factor (where *t<sub>m</sub>* = 1.7 is defined as the first significant disturbance at the baseline); area (%RSD) = relative standard deviation for analyte retention time and expressed as a percentage; *N* = theoretical plates; *A<sub>F</sub>* = asymmetry factor.

**Table S5.** Precision and accuracy of the analytical method for the determination P4 in human plasma samples.

| <b>Nominal concentration / ng mL<sup>-1</sup></b>  | <b>500</b> | <b>1500</b> | <b>2500</b> |
|----------------------------------------------------|------------|-------------|-------------|
| <b>Intra-day / n<sup>a</sup> = 6</b>               |            |             |             |
| <b>Concentration analyzed / ng mL<sup>-1</sup></b> | 471.64     | 1289.3      | 2376.5      |
| <b>Precision / %RSD<sup>b</sup></b>                | 7.76       | 1.55        | 2.92        |
| <b>Accuracy / %RE<sup>c</sup></b>                  | -5.67      | -14.1       | -4.39       |
| <b>Inter-day / n<sup>a</sup> = 3</b>               |            |             |             |
| <b>Concentration analyzed / ng mL<sup>-1</sup></b> | 464.80     | 1327.1      | 2388.9      |
| <b>Precision / %RSD<sup>b</sup></b>                | 1.60       | 3.38        | 0.16        |
| <b>Accuracy / %RE<sup>c</sup></b>                  | -7.03      | -3.69       | -4.42       |

<sup>a</sup>n = number of repetitions; <sup>b</sup>%RSD = mean relative standard deviation; <sup>c</sup>%RE = mean relative error

**Table S6.** Chromatographic conditions and range investigated during robustness tests.

| <b>Variables</b>                            | <b>Variations</b>   | <b>Concentration<br/>/ ng mL<sup>-1</sup></b> | <b>%RSD<sup>a</sup></b> | <b>%RE<sup>b</sup></b> | <b><i>p</i>-value<sup>c</sup></b> |
|---------------------------------------------|---------------------|-----------------------------------------------|-------------------------|------------------------|-----------------------------------|
| <b>Flow rate / mL min<sup>-1</sup></b>      | 0.90                | 2399.65                                       | 3.83                    | -4.14                  | 0.535                             |
|                                             | 1.00                | 2465.23                                       | 3.31                    | -1.39                  |                                   |
|                                             | 1.10                | 2478.45                                       | 3.37                    | -0.86                  |                                   |
| <b>Mobile phase<br/>proportion / %, v/v</b> | 70:30               | 2654.73                                       | 4.41                    | 6.19                   | 0.341                             |
|                                             | 72:28               | 2580.71                                       | 6.57                    | 3.22                   |                                   |
|                                             | 68:32               | 2486.56                                       | 2.89                    | -0.53                  |                                   |
| <b>Analytical column</b>                    | Agilent (250 mm)    | 2400.57                                       | 4.29                    | -3.97                  | 0.973                             |
|                                             | Phenomenex (250 mm) | 2678.65                                       | 5.72                    | -4.85                  |                                   |
|                                             | Phenomenex (150 mm) | 2393.66                                       | 4.77                    | -4.25                  |                                   |

<sup>a</sup>%RSD = mean relative standard deviation of the six repetitions; <sup>b</sup>%RE = mean relative error of the six replicates;

<sup>c</sup>Significance level of the  $p \geq 0.05$

**Table S7.** Stability test of P4 in human plasma.

|                                                  | <i>p</i> -value <sup>b</sup> | %RSD <sup>c</sup> |
|--------------------------------------------------|------------------------------|-------------------|
| <b>12 h room temperature (n<sup>a</sup> = 6)</b> |                              |                   |
| 500                                              | 0.562                        | 3.20              |
| 2500                                             | 0.132                        | 4.62              |
| <b>Freeze/thaw cycles (n<sup>a</sup> = 6)</b>    |                              |                   |
| 500                                              | 0.051                        | 4.53              |
| 2500                                             | 0.137                        | 5.29              |
| <b>96 h freeze (n<sup>a</sup> = 6)</b>           |                              |                   |
| 500                                              | 0.360                        | 6.21              |
| 2500                                             | 0.003                        | 4.78              |

<sup>a</sup> n = number of repetitions; <sup>b</sup> Significance level set at  $p \geq 0.05$ ; <sup>c</sup> %RSD = average relative standard deviation of six repetitions.



## Figures

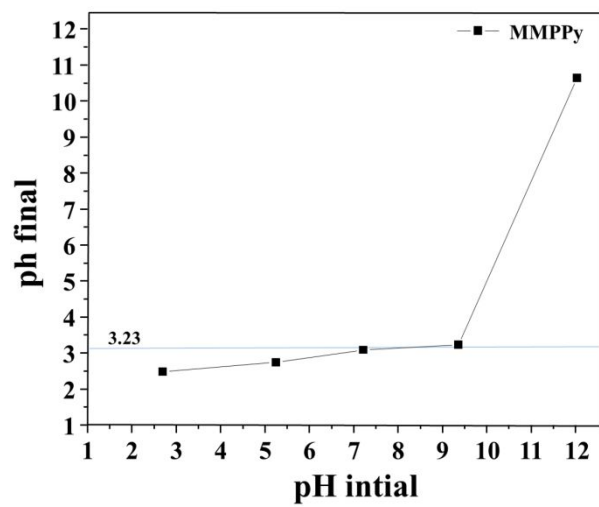

Figure S1.  $\text{pH}_{\text{PZC}}$  of MMPPy.

| #   | Criterion                                                   |                                                                                                    | Score | Weight |
|-----|-------------------------------------------------------------|----------------------------------------------------------------------------------------------------|-------|--------|
| 1.  | Sample preparation placement:                               | On site                                                                                            | 0.33  | 1      |
| 2.  | Hazardous materials:                                        | 1 [g or mL]                                                                                        | 0.33  | 5      |
| 3.  | Sustainability, renewability, and reusability of materials: | Materials are not sustainable or renewable, but are used SEVERAL TIMES                             | 0.50  | 2      |
| 4.  | Waste:                                                      | 2.51 [g or mL]                                                                                     | 0.48  | 4      |
| 5.  | Size economy of the sample                                  | Mass or volume of the sample: 1 [g or mL]                                                          | 0.67  | 2      |
| 6.  | Sample throughput:                                          | 60 [samples/h]                                                                                     | 0.96  | 3      |
| 7.  | Integration and automation                                  | Sample prep. steps: 3 steps, Manual systems                                                        | 0.19  | 2      |
| 8.  | Energy consumption:                                         | 1 [W]                                                                                              | 1.00  | 4      |
| 9.  | Post-sample preparation configuration for analysis:         | GC and HPLC with non-MS detection, atomic absorption spectroscopy, capillary electrophoresis, etc. | 0.50  | 2      |
| 10. | Operator's safety:                                          | 1 hazard                                                                                           | 0.75  | 3      |

**Figure S2.** Criterion and data input for each subcategory with the final scores and weight employed for the sample preparation method.
